# Supplementary material
Source: PubMed Central journal article supplement (PMC2957154)
Supplement: supp_110.084889_84889supptable2.pdf [file supp_110.084889_84889supptable2.pdf]

**SUPPLEMENTAL TABLE 2: Normalized expression in testes of *Gapdh*, *18s rRNA*,  $\beta$ - *Actin* and *Gapdhs* in spermatogenic cell types.**

| Probes          | Normalized expression in spermatogonia | Normalized expression in spermatocytes | Normalized expression in spermatids | Common name   |
|-----------------|----------------------------------------|----------------------------------------|-------------------------------------|---------------|
| AFFXGapdhMur    | 1.852922                               | 0.578741                               | 0.577617                            | <i>Gapdh</i>  |
| AFFX-18SRNAMur  | 2.341947                               | 0.300077                               | 0.253701                            | <i>Rn18s</i>  |
| AFFX-b-ActinMur | 1.688389                               | 0.652539                               | 0.614922                            | <i>Actb</i>   |
| 1449974_at      | 0.027287                               | 1.671908                               | 30.99607                            | <i>Gapdhs</i> |
