# Supplementary material
Source: PubMed Central journal article supplement (PMC2957154)

# Pathway Figure Legends

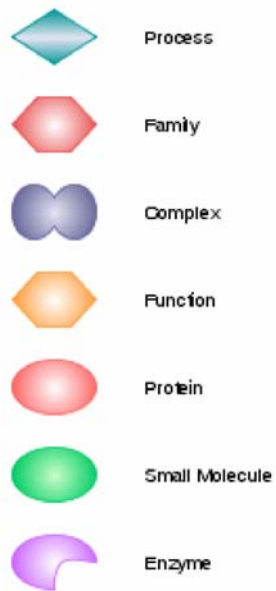

Node -Legend

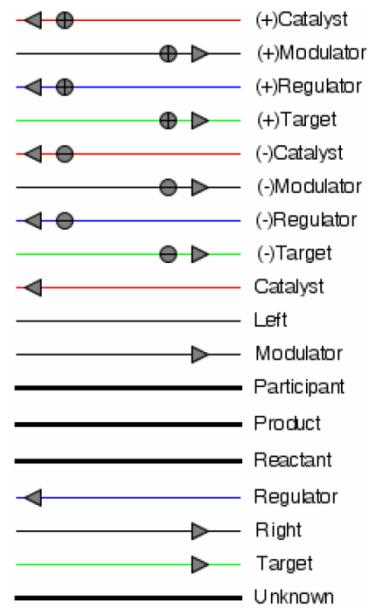

Edges -Legend

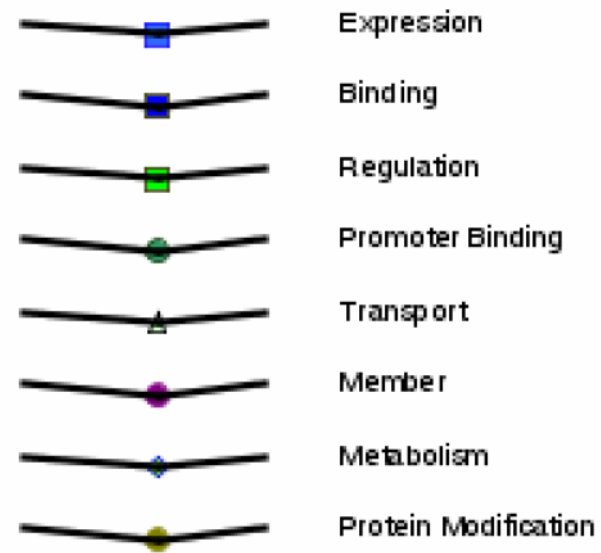

Relationship -Legend

Supplement: supp_110.084889_pathway_legends.pdf [file supp_110.084889_pathway_legends.pdf]
